# Supplementary material
Source: PubMed Central journal article supplement (PMC4771337)
Supplement: AEM.02583-15_zam999116979so1.pdf [file AEM.02583-15_zam999116979so1.pdf]

1  
2  
3  
4  
5  
6  
7  
8  
9  
10  
11  
12  
13

Supplemental Information for

**Ultrafiltration and Microarray Detect Microbial Source Tracking Marker and  
Pathogen Genes in Riverine and Marine Systems**

Xiang Li, Department of Civil and Environmental Engineering, West Virginia University

Valerie J. Harwood, Department of Integrative Biology, University of South Florida

Bina Nayak, Department of Integrative Biology, University of South Florida

Jennifer Weidhaas \*, Department of Civil and Environmental Engineering, West Virginia

University, PO Box 6103, Morgantown, WV 26506, USA, PH: 304-293-9952, E:

[jennifer.weidhaas@mail.wvu.edu](mailto:jennifer.weidhaas@mail.wvu.edu)

\* Corresponding author

14 Table S1. qPCR reactions used in this study

15

| Organism (gene target)                | Primer (F and R) and Probe (P) Sequence (5'-3')                                          | Standard Curve      | Reaction efficiency (R <sup>2</sup> ) | Reference |
|---------------------------------------|------------------------------------------------------------------------------------------|---------------------|---------------------------------------|-----------|
| Enterococcus spp.<br>(23S rRNA)       | F: GAGAAATTCCAAACGAACTTG<br>R: CAGTGCTCTACCTCCATCATT<br>P: TGGTTCTCTCCGAAATAGCTTTAGGGCTA | y= -0.3597x+11.966  | 130% (0.994)                          | (1)       |
| Bacteroidales<br>(16S rRNA)           | F: GGGGTTCTGAGAGGAAGGT<br>R: CCGTCATCCTTCACGCTACT<br>P: CAATATTCCTCACTGCTGCCTCCCGTA      | y=-0.3297x+13.839   | 114% (0.997)                          | (2)       |
| E. coli<br>(uidA)                     | F: GTCCAAAGCGGCGATTTG<br>R: CAGGCCAGAAGTTCTTTTTTCCA<br>P: ACGGCAGAGAAGGTA                | y=-0.3373x+13.371   | 118 % (0.997)                         | (3)       |
| Salmonella spp.<br>(invA)             | F: CGTTTCCTGCGGTA CTGTTAATT<br>R: AGACGGCTGGTACTGATCGATAA<br>P: CCACGCTCTTTCGTCT         | y=-0.3238x+13.87    | 112% (0.994)                          | (3)       |
| Brevibacterium sp.<br>LA35 (16S rRNA) | F: ACCGGATACGACCATCTGC<br>R: TCCCCAGTGTCAGTCACAGC<br>P: CAGCAGGGAAGAAGCCTTCGGGTGACGGTA   | y=-0.2649x+10.38    | 84% (0.999)                           | (4)       |
| Staphylococcus<br>aureus (sec)        | F: CGTATTAGCAGAGACCAACCA<br>R: GTGAATTTACTCGCTTTGTGCAA<br>P: ACCCTACGCCAGATGA            | y=-0.2904x+12.366   | 109% (0.996)                          | (3)       |
| Norovirus<br>(RNA polymerase)         | F: GCYATGTTCCGYTGGATGC<br>R: GTCCTTAGACGCCATCATCATT                                      | y=-0.3743x+11.279   | 138% (0.992)                          | (5)       |
| Polyomavirus<br>(T antigen)           | F: AGT CTT TAG GGT CTT CTA CCT TT<br>R: GGT GCC AAC CTA TGG AAC AG                       | y=-0.3761x+12.673   | 121% (0.987)                          | (6)       |
| Human Bacteroidales<br>(16s rRNA)     | F: ATCATGAGTTCACATGTCCG<br>R: TACCCCGCCTACTATCTAATG                                      | y=-0.3038x+11.095   | 101% (0.998)                          | (7)       |
| Adenovirus (hexon<br>gene)            | F: GGACGCCTCGGAGTACCTGAG<br>R: ACIGTGGGGTTTCTGAACTTGTT<br>P: CTGGTGCAGTTCGCCCCGTGCCA     | y= -0.3545x +6.6727 | 89% (0.986)                           | (8)       |

16 **References**

17

18 1. **Ludwig, W., and K. H. Schleifer.** 2000. How quantitative is quantitative PCR with  
19 respect to cell counts? *Syst Appl Microbiol* **23**:556-62.

20 2. **Dick, L. K., and K. G. Field.** 2004. Rapid estimation of numbers of fecal  
21 Bacteroidetes by use of a quantitative PCR assay for 16S rRNA genes. *Appl*  
22 *Environ Microbiol* **70**:5695-7.

23 3. **Lee, D. Y., K. Shannon, and L. A. Beaudette.** 2006. Detection of bacterial  
24 pathogens in municipal wastewater using an oligonucleotide microarray and  
25 real-time quantitative PCR. *J Microbiol Methods* **65**:453-67.

26 4. **Weidhaas, J. L., T. W. Macbeth, R. L. Olsen, M. J. Sadowsky, D. Norat, and V. J.**  
27 **Harwood.** 2010. Identification of a *Brevibacterium* marker gene specific to  
28 poultry litter and development of a quantitative PCR assay. *J Appl Microbiol*  
29 **109**:334-47.

30 5. **Wolf, S., J. Hewitt, and G. E. Greening.** 2010. Viral multiplex quantitative PCR  
31 assays for tracking sources of fecal contamination. *Applied and*  
32 *environmental microbiology* **76**:1388-94.

33 6. **McQuaig, S. M., T. M. Scott, V. J. Harwood, S. R. Farrah, and J. O. Lukasik.** 2006.  
34 Detection of human-derived fecal pollution in environmental waters by use  
35 of a PCR-based human polyomavirus assay. *Appl Environ Microbiol* **72**:7567-  
36 74.

37 7. **Bernhard, A. E., and K. G. Field.** 2000. A PCR assay To discriminate human and  
38 ruminant feces on the basis of host differences in *Bacteroides-Prevotella*  
39 genes encoding 16S rRNA. *Appl Environ Microbiol* **66**:4571-4.

40 8. **Jothikumar, N., T. L. Cromeans, V. R. Hill, X. Lu, M. D. Sobsey, and D. D.**  
41 **Erdman.** 2005. Quantitative real-time PCR assays for detection of human  
42 adenoviruses and identification of serotypes 40 and 41. *Applied and*  
43 *environmental microbiology* **71**:3131-6.

44

45
